# Supplementary material for: Self-supervised machine learning for live cell imagery segmentation
Source: PubMed Central journal article supplement (PMC9630527; doi:10.1038/s42003-022-04117-x), 2022-11-02
Supplement: 42003_2022_4117_MOESM2_ESM.pdf [file 42003_2022_4117_MOESM2_ESM.pdf]

## Description of Additional Supplementary Files

**File name:** Supplementary Data

**Description:** TIFF imagery evaluated in Figure 3.

**File name:** Supplementary Software 1

**Description:** Stand alone graphical user interface software. Includes instantiations for Windows, Mac and Linux operating systems.

**File name:** Supplementary Software 2

**Description:** Matlab source code used to generate the results with options for the user to run their own imagery.
